# Supplementary material for: Synthesis and ring opening reactions of a 2-silabicyclo[2.1.0]pentane
Source: Royal Society of Chemistry journal article supplement (doi:10.1039/b312110k), 2004-01-01
Supplement: b312110k.doc [file b312110k.doc]

**Synthesis and ring opening reactions of a 2-silabicyclo[2.1.0]pentane**

Gerhard Maas,* Birgit Daucher, Alexandra Maier, and Volker Gettwert

##### Division of Organic Chemistry I, University of Ulm, Albert-Einstein-Allee 11, D-89081 Ulm, Germany

### Supporting Information

Experimental Procedures and Spectroscopic Data

**General Methods.** All reactions were carried out in oven-dried glassware and under an argon atmosphere. Solvents were dried by standard procedures. The petroleum ether used had a boiling range of 40–60 oC. Column chromatography was performed under hydrostatic conditions (silica gel Si 60, 0.0630.2 mm, Macherey-Nagel). For bulb-to-bulb distillations, oven temperatures are given. Photolyses were carried out using a high-pressure mercury lamp (Philips HPK 125 W, l ³ 300 nm).  NMR: Bruker AMX 500 (1H: 500.14 MHz; 13C: 125.77 MHz, 29Si: 99.36 MHz), Bruker AMX 400 (1H: 400.1 MHz; 13C: 100.6 MHz), and Bruker AC 200 (1H: 200.13 MHz; 13C: 50.32 MHz); CDCl3 was used as solvent if not stated otherwise. Abbreviation: mc = centered multiplet. As the internal reference, Me4Si was used for the 1H and 29Si spectra, and the solvent signal for the 13C NMR spectra [(CDCl3) = 77.0 ppm]. Assignments of 13C chemical shifts are based on proton-coupled and inverse (C,H) correlation spectra.  IR: Perkin-Elmer IR 883, IR 1310, Bruker IFS 113.  MS: Finnigan MAT SSQ 7000 (EI and CI mode).  Microanalyses were carried out in the Analytical Laboratories of the University of Ulm on an Elementar Vario EL instrument.

**Allyl(chloro)(diisopropyl)silane***.* A solution of dichloro(diisopropyl)silane (6.15 g, 6.0 mL, 33.2 mmol) in THF (30 mL) was cooled at 0 oC, and a solution of allyl magnesium chloride in THF (2 m, 16.6 mL, 33.2 mmol) was added. After stirring at rt for 2 h and evaporation of the solvent, the product was extracted into pentane (3´50 mL) and isolated by bulb-to-bulb distillation at 100 oC/0.02 mbar to give a colorless liquid (3.50 g) which was a 77:23  83:17 mixture of allyl-chloro-(diisopropyl)silane and diallyl(diisopropyl)silane (1H NMR:  1.61 (dt, C*H*2CH=CH2)). Further purification of the chlorosilane was not attempted because the minor component does not interfere with the synthesis of diazoacetate **1** in the following step. 1H NMR (200.13 MHz) d 1.05–1.20 (d+sept, 14H, C*HMe*2), 1.86 (dt, 2H, C*H*2-CH=CH2), 4.78–5.04 (m, 2H, H2C=), 5.83 (mc, 1H, =CH); GC/MS (EI, 70 eV) *m/z* (rel int) 190/192 (M+, 13),149/151 (M+allyl, 35), 121 (87), 93 (100).

**Methyl a-[Allyl(diisopropyl)silyl]-a-diazoacetate (1).** A solution of LDA, prepared at 0 oC from diisopropylamine (5.76 g, 6.6 mL, 46.8 mmol) in THF (60 mL) and buthyl lithium in hexane (1.6 m, 29.4 mL, 47.0 mmol) was cooled at 100 oC, and methyl diazoacetate1 (4.68 g, 46.8 mmol) in THF (40 mL) was added gradually. Still at 100 oC, the mixture was allowed to react for 20 min, allyl-chloro-(diisopropyl)silane [3.00 g, 77% purity (see above) corresponding to 12.1 mmol] dissolved in THF (10 mL) was added, and stirring was continued for 30 min. The mixture was brought to rt and water was added. The product was extracted into dichloromethane (3x50 mL), purified by column chromatography [silica gel (100 g), eluent ether–petroleum ether (1:1)] and subjected to bulb-to-bulb distillation at 90 oC/0.02 mbar; yield: 2.50 g (81% based on the silane). 1H NMR (500.14 MHz) d 1.07 (d, 6H, CH*Me*), 1.08 (d, 6H, CH*M*e), 1.24 (sept, 2H, C*H*Me2), 1.84 (d, *J* = 8.1 Hz, CH2), 3.73 (s, 3H, OMe), 4.90 (dd, 3*J* = 10.0 Hz, 2*J* = 0.9 Hz, 1H, CH2=), 4.93 (ddt, 3*J* = 16.9 Hz, 1H, CH2=), 5.81 (mc, 1H, =CH); 13C NMR (100.6 MHz, C6D6) d 11.73 (*C*HMe2), 17.12 (t, CH2), 17.79 and 17.91 (CH*Me*2), 41.23 (CN2), 51.40 (OMe), 114.79 (CH2=), 133.96 (CH=), 168.78 (C=O); 29Si NMR (99.37 MHz) d 2.1; IR (film) n 2945 (s), 2866 (s), 2098/2082 (vs, CN2), 1687 (s, C=O), 1631 (m), 1261 (s), 1204 (s), 1077 (s) cm-1. Anal. calcd. for C12H22N2O2Si (254.4): C, 56.66; H, 8.72; N, 11.01. Found: C, 56.24; H, 8.70; N, 11.38.

**Methyl 2,2-Diisopropyl-2-silabicyclo[2.1.0]pentane-2-carboxylate (2).** A solution of diazoacetate **1** (2.50 g, 9.8 mmol) in toluene (50 mL) was irradiated (l ³ 300 nm) for 2.5 h. The solvent was evaporated at 0.01 mbar, and the product was isolated by bulb-to-bulb distillation at 100 oC/0.02 mbar; yield: 1.51 g (68 %). 1H NMR (500.14 MHz) d 0.67 (dd, 2*J* = 14.1 Hz, 3*J* = 1.2 Hz, 1H, 3-Hendo), 1.03 ("s", 4H, CH*Me* + C*H*Me2), 1.06 (d, 3H, CH*Me*), 1.07 (dd, 1H, 3-Hexo, obscured by another signal), 1.08 and 1.11 (each d, 3*J* = 7.5 Hz, 3H, CH*Me*), 1.29 (pseudo-t, 1H, 5-Hsyn), 1.33 (sept, 2H, C*H*Me2), 1.72 (mc, 1H, 5-Hanti), 2.25 (mc, 1H, 4-H), 3.61 (s, 3H, OMe); 13C NMR (125.77 MHz) d 8.45 (C-3), 11.76 and 13.05 (*C*HMe2), 16.99 (C-1), 17.01/17.13/17.28/18.31 (CH*Me*2), 23.93 (2*J*(C,H) = 165 Hz, C-5), 26.55 (2*J*(C,H) = 181 Hz, C-4), 51.29 (OMe), 174.50 (C=O); 29Si  10.7; IR (film) n 3050 (w), 2930 (s), 1705 (s, C=O), 1445 (s), 1425 (s), 1312 (s), 1255 (s, br), 1148, 1130, 1118, 1108, 1095 (all s) cm-1; MS (EI, 70 eV) *m/z* (rel int) 226 (M+, 14), 183 (M+  *i*Pr, 100), 141 (17), 113 (M2+, 26), 75 (16), 59 (38). Anal. calcd. for C12H22O2Si (226.4): C, 63.67; H, 9.79. Found: C, 63.10; H, 9.50.

**Methyl 2-[Diisopropyl(methoxy)silylmethyl]cyclopropane-1-carboxylate (3).** Silabicyclopentane **2** (160 mg, 0.71 mmol) was dissolved in methanol (2 mL). After 15 h, the solvent was removed and the residue was distilled bulb-to-bulb at 60 oC/0.02 mbar to give **3** (87 mg, 48 %) as a mixture of diastereomers, *E*:*Z* = 53:47. 1H NMR (500.14 MHz) d 0.55 (dd, *J* = 14.9, 7.8 Hz, 1 H), 0.73 (mc, 1 H), 0.91–0.97 (m, 4 H), 1.02–1.12 (m, 2829 H, C*HMe*2 + 1cp-H?), 1.22–1.26 (m, 1–2 H), 1.32–1.40 (m, 3 H), 1.72 (mc, 1 H, 1-H), 3.53 (s, 6 H, SiOMe, *E*+*Z*), 3.65 (s, 3 H, COOMe), 3.69 (s, 3 H, COOMe); 13C (125.77 MHz)  7.87, 12.20/12.35 (*C*HMe2), 14.85, 15.69, 17.11, 17.45/17.49 (CH*Me*2), 18.34, 19.73, 22.88, 51.38/51.49/51.53 (COO*Me* and SiOMe), 173.25/174.76 (C=O); IR (film) n 3001 (w), 2943 (s), 2865 (s), 1730 (s), 1169 (s), 1099 (s), 882 (m) cm-1; MS (EI, 70 eV) *m/z* (rel int) 258 (M+, 2), 243 (2), 215 (M+–*i*Pr, 48), 145 (Si*i*Pr2OMe, 436), 133 (53), 59 (CO2Me, 100). Anal. calcd. for C13H26O3Si (258.4): C, 60.42; H, 10.14. Found: C, 59.39; H, 10.01.

When the reaction was carried out in [D4]methanol, methyl 2-{[diisopropyl([2H3]methoxy)silyl]methyl}-[1-2H1]cyclopropane-1-carboxylate was obtained; IR (film) n 2065 cm-1 (m, C–D); MS (EI, 70 eV) *m/z* (rel int) 262 (M+, 2.2), 219 (M+–*i*Pr, 70), 148 (Si*i*Pr2OCD3,79), 136 (86) 108 (100). Compared to the 1H NMR spectrum of undeuterated **3**, the signals at  1.72 and  3.53 had disappeared.

**Methyl 1,1-Diisopropyl-1-sila-4-cyclopentene-2-carboxylate (5).** A solution of **2** (0.13 g, 0.57 mmol) in chloroform (5 mL) containing a few mg of TsOH was allowed to react for 5 days. Evaporation of the solvent and bulb-to-bulb distillation at 50 oC/0.008 mbar furnished 80 mg (62%) of **5** as a colourless oil. 1H NMR (400.14 MHz) d 0.91/0.97/1.01/1.05 (4 d, 12 H, CH*Me*2), ca 0.90–1.00 (1H, C*H*Me2, obscured by other signals), 1.08 (sept, 1H, C*H*Me2), 2.43 (dd, 3*J* = 8.7, 6.3 Hz, 1H, 2-H), 2.64 (dddd, |2*J*| = 18.4 Hz, 3*J* = 8.7 Hz, 3*J* = 2.9 Hz, |4*J*| = 1.9 Hz, 1H, 3-H), 2.92 (ddt, |2*J*| = 18.4 Hz, 3*J* = 6.3 Hz, 3*J* = |4*J*| = 2.4 Hz, 1H, 3-H), 3.64 (s, 3H, OMe), 5.73 (dt, 3*J* = 10.4 Hz, |4*J*| = 2.2 Hz, 1H, 5-H), 6.83 (dt, 3*J* = 10.4, 2.7 Hz, 1H, 4-H); 13C NMR (100.6 MHz) d 11.54 (*C*HMe2), 17.81/17.87/18.21 (CH*Me*2), 28.6 (C-2), 35.7 (C-3), 51.5 (OMe), 123.6 (C-5), 153.0 (C-4), 176.2 (C=O); IR (film) n 2905 (s), 2830 (s), 1700 (vs, br, C=O), 1545 (w), 1178 (s), 1135 (s) cm-1. Anal. calcd. for C12H22O2Si (226.4): C, 63.67; H, 9.79. Found: C, 63.10; H, 9.80. According to 1H NMR, the product contained ca 16% of a by-product which shows separate signals at d 2.20–2.35 (m), ca. 2.6 (intensity enhancement of a signal of **5**) 3.58 (s), 4.85–5.02 (m), 5.70–5.78 (m), and is likely to have the constitution (XSi*i*Pr2)CH(CO2Me)CH2CH=CH2 (**6**) where X is probably OH or results from SiOH condensation.

**2-[Diisopropyl(methoxy)silyl]-1,4-pentadien-1-one (7).** a) A solution of silabicyclopentane **3** (1.00 g, 4.42 mmol) in toluene (2 mL) was placed in a pressure Schlenk tube and heated at 150 oC for 19 h. The solvent was evaporated at rt/0.02 mbar, and the residue (0.75 g) was fractionated by bulb-to-bulb distillation to give the following fractions: a1) at 70100 oC/0.02 mbar 330 mg of an oil consisting of **3** and **7** in the ratio 40.3:59.7 corresponding to 87% conversion and a 20% yield of ketene **7**. a2) At 160170 oC/0.02 mbar 300 mg of an oil the 1H NMR spectrum of which shows groups of signals for *i*Pr, OMe (SiOMe and COOMe) and allyl groups; the shape of these signals indicate the presence of several compounds and/or of oligomers.

b) Thermolysis of **3** (1.00 g) in toluene (2 mL) at 150 oC for 29 h led to the complete consumption of **3**. After evaporation of the solvent and bulb-to-bulb distillation at 100 oC/0.02 mbar, 70 mg (7%) of ketene **7** was obtained which could not be obtained in analytically pure form (1H NMR: traces of impurities which give signals at  3.553.65 (OMe signals) and enhance the integration of SiC*HMe*2 signals).

1H NMR (200.13 MHz) d 0.98–1.04 (m, 14H, C*HMe*2), 2.62 (dt, 3*J* = 6.4 Hz, |4*J*cis,trans| = 1.5 Hz, 2H, CH2-allyl), 3.47 (s, 3H, OMe), 4.96 (ddt, 3*J* = 10.5 Hz, |2*J*| = |4*J*| = 1.5 Hz, 1 H), 5.10 (ddt, 3*J* = 16.7 Hz, |2*J*| = |4*J*| = 1.5 Hz, 1 H), 5.745.94 (m, 1 H); 13C NMR (50.32 MHz) d 9.34 (*C*=C=O), 13.04 (SiCH), 17.27 (CH*Me*2), 25.85 (CH2-allyl), 51.46 (OMe), 115.33, 136.64, 181.70 (C=*C*=O); IR (film) n 2945 (m), 2866 (m), 2089 (s, C=C=O), 1465 (w), 1097 (m) cm-1; MS (CI, 100 eV) *m/z* (rel int) 227 (MH+, 58), 195 (MH+  CH3OH, 15), 183 (M+iPr, 54), 145 (*i*Pr2SiOMe, 100).

Reference

(1) Searle, N. E. *Org. Synth., Coll. Vol. IV*, **1963**, 424–426.
